# Supplementary material for: D–π–A-type fluorinated tolanes with a diphenylamino group: crystal polymorphism formation and photophysical behavior
Source: Royal Society of Chemistry journal article supplement (doi:10.1039/d1ce01671g), 2022-01-01
Supplement: d1ce01671g1.pdf [file d1ce01671g1.pdf]

## ***Electronic Supplementary Information***

### **D- $\pi$ -A-type fluorinated tolans with a dphenylamino group: Crystal polymorphism formation and photophysical behavior**

Shigeyuki Yamada,\* Kazuki Kobayashi, Masato Morita and Tsutomu Konno

Faculty of Molecular Chemistry and Engineering, Kyoto Institute of Technology,  
Matsugasaki, Sakyo-ku, Kyoto 606-8585, Japan

\*Correspondence: [syamada@kit.ac.jp](mailto:syamada@kit.ac.jp); Tel: +81-75-724-7517

#### ***Table of Contents***

|                                    |       |      |
|------------------------------------|-------|------|
| 1. Experimental                    | ..... | S-2  |
| 2. NMR Spectra                     | ..... | S-4  |
| 3. X-ray crystallographic analysis | ..... | S-6  |
| 4. DFT Calculation                 | ..... | S-7  |
| Cartesian coordinate               | ..... | S-7  |
| 5. Photophysical Characteristics   |       |      |
| Solution state                     | ..... | S-9  |
| Crystalline state                  | ..... | S-9  |
| Solvatochromic PL                  | ..... | S-10 |
| 6. References                      | ..... | S-10 |

## 1. Experimental

### 1.1. General methods

$^1\text{H}$  and  $^{13}\text{C}$  NMR spectra were obtained with a Bruker AVANCE III 400 NMR spectrometer ( $^1\text{H}$ : 400 MHz and  $^{13}\text{C}$ : 100 MHz) in chloroform-*d* ( $\text{CDCl}_3$ ) solution and the chemical shifts are reported in parts per million (ppm) using the residual proton in the NMR solvent.  $^{19}\text{F}$  NMR (376 MHz) spectra were obtained with a Bruker AVANCE III 400 NMR spectrometer in  $\text{CDCl}_3$  solution with hexafluorobenzene ( $\delta_{\text{F}} = 163$  ppm) as an internal standard. Infrared spectra (IR) were recorded in a KBr method with a JASCO FT/IR-4100 type A spectrometer; all spectra were reported in wavenumber ( $\text{cm}^{-1}$ ). High resolution mass spectra (HRMS) were recorded on a JEOL JMS-700MS spectrometer using fast atom bombardment (FAB) methods. All reactions were carried out using dried glassware with a magnetic stirrer bar. All chemicals were of reagent grade and where necessary were purified in the usual manner prior to use. Column chromatography was carried out on silica gel (Wakogel<sup>®</sup> 60N, 38-100  $\mu\text{m}$ ) and TLC analysis was performed on silica gel TLC plates (Merck, Silica gel 60F<sub>254</sub>).

### 1.2. Synthesis

#### Typical synthetic procedure for 2,3,5,6-tetrafluoro-4-[(4-(diphenylamino)phenyl)ethynyl]benzonitrile (**1**)

In a two-necked round-bottomed flask, equipped with a Teflon<sup>®</sup>-coated stirrer bar was placed 4-diphenylamino-phenyl acetylene (0.99 g, 3.7 mmol) and THF (36 mL) and cooled to 0 °C. To the resultant solution was added a solution of *n*-BuLi (1.6 mol L<sup>-1</sup>; 3.5 mL, 5.55 mmol) and the whole was stirred room temperature overnight. After being stirred at the temperature for 18 h, the resultant solution was poured into saturated aqueous  $\text{NH}_4\text{Cl}$  solution (30 mL). Crude product was extracted with EtOAc (30 mL, three times) and organic layer combined was washed with brine (once). The collected organic layer was dried over anhydrous  $\text{Na}_2\text{SO}_4$ , which was separated by filtration. The filtrate was evaporated in vacuo and subjected to silica-gel column chromatography (eluent: hexane/EtOAc = 10/1), followed by recrystallization from  $\text{CH}_2\text{Cl}_2$ /Hexane ( $v/v = 1/1$ ), to obtain the **1** in 19% (0.30 g, 0.69 mmol) as a green crystal.

#### 2,3,5,6-tetrafluoro-4-[(4-(diphenylaminophenyl)ethynyl]benzonitrile (**1**)

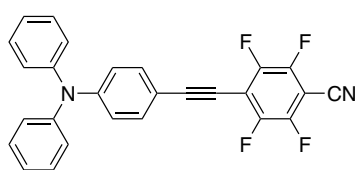

Yield: 19%; m.p.: 136.5 °C (**1-G**), 142.6 °C (**1-Y**) determined by DSC;  $^1\text{H}$  NMR ( $\text{CDCl}_3$ ):

$\delta$  7.00 (d,  $J = 8.6$  Hz, 2H), 7.13–7.15 (m, 6H), 7.32 (t,  $J = 7.9$  Hz, 4H), 7.42 (d,  $J = 8.5$  Hz, 2H);  $^{13}\text{C}$  NMR ( $\text{CDCl}_3$ ):  $\delta$  73.5, 92.7, 107.7, 108.5, 111.9, 112.4, 120.9, 124.7, 125.9,

129.8, 133.5, 145.0–146.0 (dm,  $J = 76.5$  Hz), 146.7, 147.7–148.5 (dm,  $J = 70.6$  Hz),

150.2;  $^{19}\text{F}$  NMR ( $\text{CDCl}_3$ ):  $\delta$  -133.61 (ddd,  $J = 24.3, 15.2, 6.2$  Hz), -134.59 (ddd,  $J = 24.4, 15.5, 6.4$  Hz); IR (KBr):  $\nu$  3033, 2239, 2197, 1645, 1583, 1518, 1491, 1338, 1302, 1266, 1181, 1072, 986, 929  $\text{cm}^{-1}$ ; HRMS (FAB+)  $m/z$  [ $\text{M}$ ]<sup>+</sup> calcd for  $\text{C}_{27}\text{H}_{14}\text{F}_4\text{N}_2$ : 442.1093; found: 442.1092.

### Typical synthesis procedure for 4-[2-[4-(diphenyl amino)phenyl]ethynyl]benzonitrile (1-H)

In a two-necked round-bottomed flask, equipped with a Teflon®-coated stirrer bar was placed 4-diphenylamino-phenyl acetylene (0.20 g, 0.76 mmol),  $\text{Cl}_2\text{Pd}(\text{PPh}_3)_2$  (0.024 g, 0.034 mmol),  $\text{PPh}_3$  (0.09 g, 0.034 mmol), 4-bromobenzonitrile (0.13 g, 0.69 mmol), and  $\text{Et}_3\text{N}$  (3 mL). To the resultant solution was added  $\text{CuI}$  (0.013 g, 0.069 mmol) and  $\text{Et}_3\text{N}$  (3 mL), and the whole was stirred at 80 °C overnight. After being stirred at the temperature for 22 h, precipitate formed in the reaction mixture was separated by atmospheric filtration and the filtrate was poured into saturated aqueous  $\text{NH}_4\text{Cl}$  solution (30 mL). Crude product was extracted with  $\text{EtOAc}$  (30 mL, three times) and organic layer combined was washed with brine (once). The collected organic layer was dried over anhydrous  $\text{Na}_2\text{SO}_4$ , which was separated by filtration. The filtrate was evaporated in vacuo and subjected to silica-gel column chromatography (eluent: hexane/ $\text{EtOAc}$  = 20/1), followed by recrystallization from  $\text{CH}_2\text{Cl}_2$ /Hexane (v/v = 1/1), to obtain the **1** in 73% (0.21 g, 0.55 mmol) as a white crystal.

### 4-[(4-diphenylaminophenyl)ethynyl]benzonitrile (1-H)

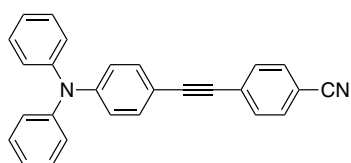

Yield: 73%; m.p.: 165.4-167.0 °C;  $^1\text{H}$  NMR ( $\text{CDCl}_3$ ):  $\delta$  7.00 (d,  $J$  = 9.2 Hz, 2H), 7.06-7.13 (m, 6H), 7.28 (dd,  $J$  = 8.7 Hz, 6.5 Hz, 4H), 7.35 (d,  $J$  = 8.7 Hz, 2H), 7.55 (d,  $J$  = 8.4 Hz, 2H), 7.61 (d,  $J$  = 8.4 Hz, 2H);  $^{13}\text{C}$  NMR ( $\text{CDCl}_3$ ):  $\delta$  87.3, 94.7, 111.1, 114.6, 118.8, 121.9, 124.1, 125.4, 128.8, 130.0, 132.0, 132.1, 132.9, 147.1, 148.9; IR (KBr):  $\nu$  3040, 2939, 2214, 1913, 1685, 1624, 1598, 1540, 1519, 1479, 1450, 1433, 1405, 1318, 1105, 1003, 915  $\text{cm}^{-1}$ ; HRMS (FAB+)  $m/z$   $[\text{M}]^+$  calcd for  $\text{C}_{27}\text{H}_{18}\text{N}_2$ : 370.1470; found: 370.1465. The spectral data were fully in accordance with the reported data<sup>1</sup>.

## 2. NMR Spectra

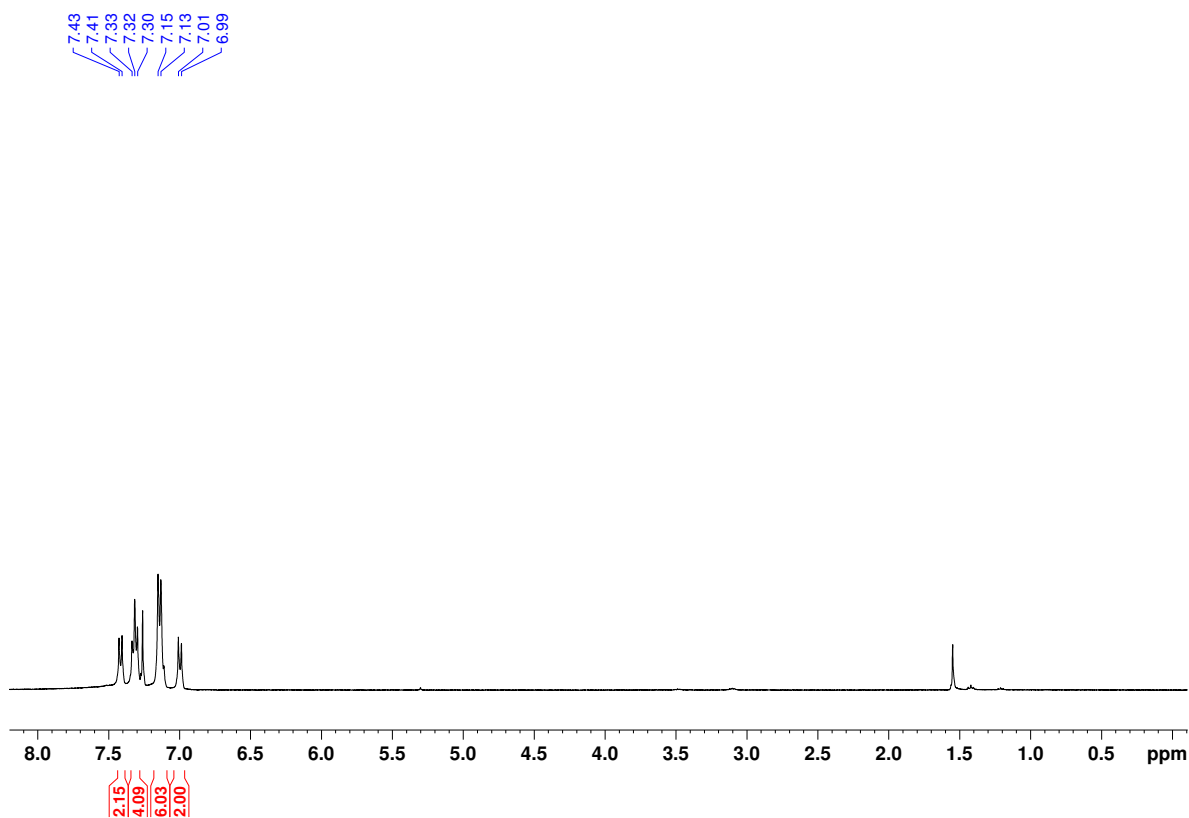

Figure S1.  $^1\text{H}$  NMR spectrum of **1** (400 MHz,  $\text{CDCl}_3$ )

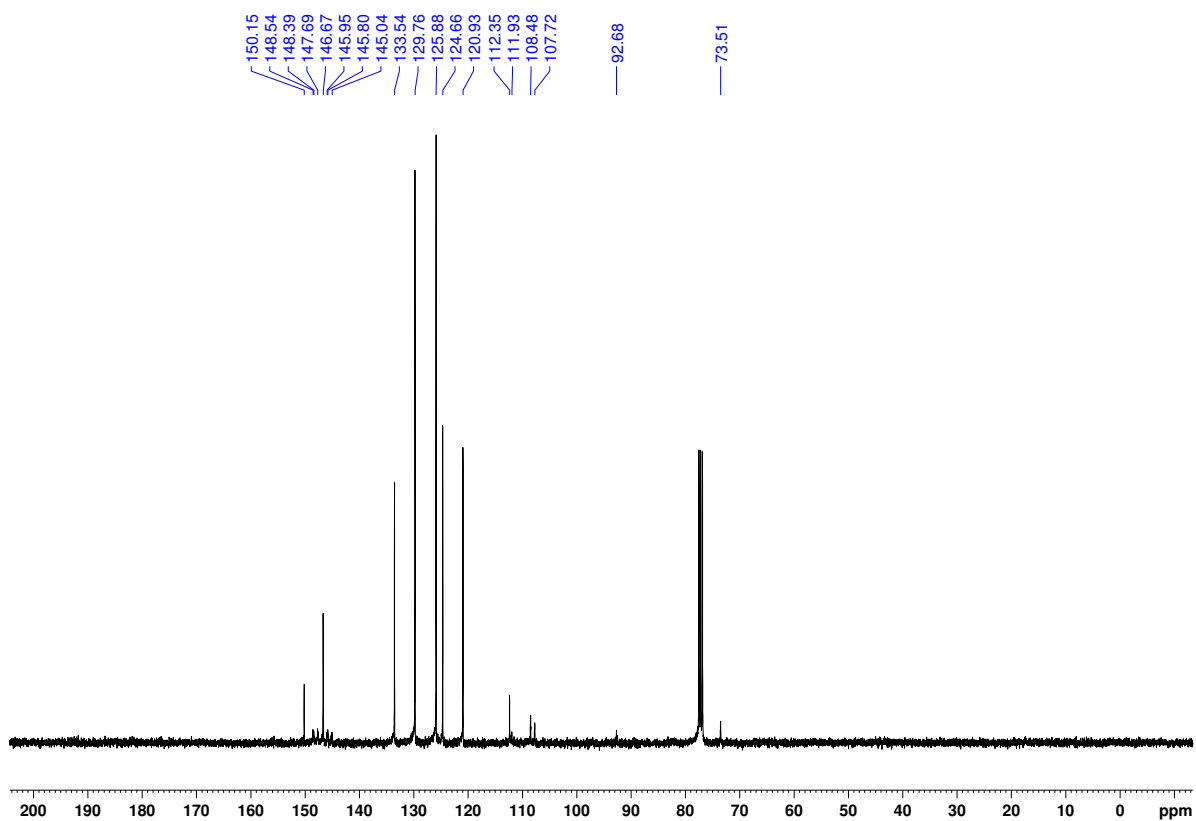

Figure S2.  $^{13}\text{C}$  NMR spectrum of **1** (100 MHz,  $\text{CDCl}_3$ )

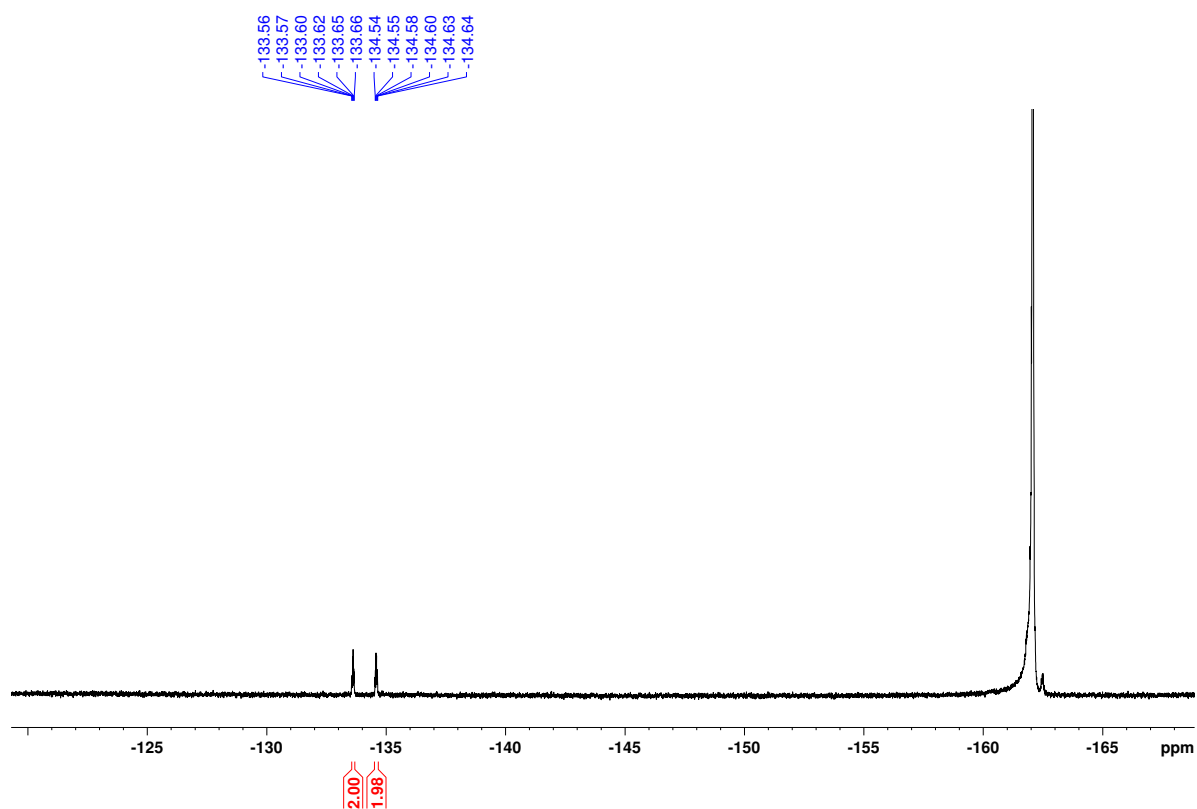

**Figure S3.**  $^{19}\text{F}$  NMR spectrum of **1** (376 MHz,  $\text{CDCl}_3$ , hexafluoro benzene)

### 3. X-ray Crystallographic Analysis

XRD spectra were recorded on a Rigaku XtaLAB AFC11 diffractometer (Rigaku Corporation, Tokyo, Japan). The reflection data were integrated, scaled, and averaged using CrysAlisPro (ver. 1.171.39.43a, Rigaku Oxford Diffraction, 2015). Empirical absorption corrections were applied using the SCALE 3 ABSPACK scaling algorithm (CrysAlisPro). Structures were solved by a direct method (SHELXT-2018/2) and refined using a full-matrix least square method (SHELXL-2018/3) visualized by Olex2-1.3<sup>2,3</sup>.

**Table S1.** Crystallographic data of **1G**, **1Y**, **1-H**

|                                                                              | <b>1G</b>                                                     | <b>1Y</b>                                                     | <b>1-H</b>                                     |
|------------------------------------------------------------------------------|---------------------------------------------------------------|---------------------------------------------------------------|------------------------------------------------|
| CCDC #                                                                       | 2125133                                                       | 2125132                                                       | 2125131                                        |
| Empirical Formula                                                            | C <sub>27</sub> H <sub>14</sub> F <sub>4</sub> N <sub>2</sub> | C <sub>27</sub> H <sub>14</sub> F <sub>4</sub> N <sub>2</sub> | C <sub>27</sub> H <sub>18</sub> N <sub>2</sub> |
| Formula weight                                                               | 442.40                                                        | 442.40                                                        | 370.43                                         |
| Temperature [K]                                                              | 297                                                           | 297                                                           | 297                                            |
| Crystal Color / Habit                                                        | Yellow / Plate                                                | Orange / Needle                                               | Colourless / block                             |
| Crystal Size [mm]                                                            | 0.647 x 0.513 x 0.105                                         | 0.629 x 0.204 x 0.151                                         | 0.681 x 0.404 x 0.283                          |
| Crystal System                                                               | Triclinic                                                     | Monoclinic                                                    | Triclinic                                      |
| Space Group                                                                  | <i>P</i> -1                                                   | <i>P</i> 1 21/ <i>c</i> 1                                     | <i>P</i> -1                                    |
| <i>a</i> [Å]                                                                 | 9.8311(3)                                                     | 7.1660(3)                                                     | 7.6818(4)                                      |
| <i>b</i> [Å]                                                                 | 10.2683(3)                                                    | 21.8984(7)                                                    | 9.1974(3)                                      |
| <i>c</i> [Å]                                                                 | 22.2426(5)                                                    | 13.6894(4)                                                    | 15.4502(5)                                     |
| <i>a</i> [°]                                                                 | 95.086(2)                                                     | 90                                                            | 76.568(3)                                      |
| <i>b</i> [°]                                                                 | 100.768(2)                                                    | 97.476(3)                                                     | 78.786(4)                                      |
| <i>g</i> [°]                                                                 | 95.042(2)                                                     | 90                                                            | 73.558(4)                                      |
| <i>V</i> [Å <sup>3</sup> ]                                                   | 2184.59(11)                                                   | 2129.23(13)                                                   | 1008.58(8)                                     |
| <i>Z</i>                                                                     | 4                                                             | 4                                                             | 2                                              |
| <i>R</i> [ <i>F</i> <sup>2</sup> > 2 <i>s</i> ( <i>F</i> <sup>2</sup> )] [a] | 0.0459                                                        | 0.0376                                                        | 0.0409                                         |
| <i>wR</i> <sub>2</sub> ( <i>F</i> <sup>2</sup> ) [b]                         | 0.1363                                                        | 0.1076                                                        | 0.1201                                         |

[a]  $R = \sum ||F_o| - |F_c|| / \sum |F_o|$ . [b]  $wR = \{[\sum w(|F_o| - |F_c|)] / \sum w|F_o|\}^{1/2}$ .

#### 4. DFT calculation

All computations were carried out using density functional theory (DFT) with the Gaussian 16 (Rev. B.01) package. Geometry optimizations were executed using the M06-2X hybrid functional and 6-31+G(d) basis set with a CPCM<sup>4</sup> for dichloromethane. Vertical excitations were also calculated using a TD-DFT method at the same level of theory.

**Table S2.** Dipole moment (debye) of **1**, **1-H** at franck-condon state.

| Dipole moment (debye) |                                                  |
|-----------------------|--------------------------------------------------|
| <b>1</b>              | X= -10.0214/ Y= -0.0000/ Z= 0.0000/ Tot= 10.0214 |
| <b>1-H</b>            | X= 8.1848/ Y= 0.0000/ Z= 0.0000/ Tot= 8.1848     |

**Table S3.** Theoretical vertical transition behavior calculated by TD-DFT calculation.

|            | Transition  | Transition Energy (eV) | Theoretical Absorption<br>(nm) | Oscillator strength<br>/ f |
|------------|-------------|------------------------|--------------------------------|----------------------------|
| <b>1</b>   | HOMO → LUMO | 3.1963                 | 387.90                         | 1.4831                     |
| <b>1-H</b> | HOMO → LUMO | 3.4505                 | 359.32                         | 1.4957                     |

**Table S4.** Cartesian coordinate for **1** at the optimized geometry in S<sub>0</sub> state.

| No. | Atom | Type | Coordinates (Angstroms) |           |           | 24 | 7 | 0 | 9.555144  | -0.000009 | -0.000013 |
|-----|------|------|-------------------------|-----------|-----------|----|---|---|-----------|-----------|-----------|
|     |      |      | X                       | Y         | Z         |    |   |   |           |           |           |
|     |      |      |                         |           |           | 25 | 7 | 0 | -4.132638 | -0.000001 | 0         |
| 1   | 6    | 0    | 4.869815                | 1.118877  | -0.424841 | 26 | 6 | 0 | -4.861411 | -1.211906 | -0.158303 |
| 2   | 6    | 0    | 6.252022                | 1.121026  | -0.42542  | 27 | 6 | 0 | -5.949389 | -1.485145 | 0.676897  |
| 3   | 6    | 0    | 6.968804                | -0.000002 | -0.000004 | 28 | 6 | 0 | -4.510754 | -2.123501 | -1.159826 |
| 4   | 6    | 0    | 6.25202                 | -1.121027 | 0.425416  | 29 | 6 | 0 | -6.679617 | -2.659407 | 0.507965  |
| 5   | 6    | 0    | 4.869813                | -1.118872 | 0.424847  | 30 | 1 | 0 | -6.220021 | -0.772888 | 1.451497  |
| 6   | 6    | 0    | 4.141275                | 0.000005  | 0.000005  | 31 | 6 | 0 | -5.234914 | -3.303407 | -1.311777 |
| 7   | 6    | 0    | 2.72376                 | 0.000008  | 0.00001   | 32 | 1 | 0 | -3.672115 | -1.903054 | -1.814635 |
| 8   | 6    | 0    | 1.509902                | 0.00001   | 0.000014  | 33 | 6 | 0 | -6.323757 | -3.575934 | -0.482129 |
| 9   | 6    | 0    | 0.084838                | 0.000007  | 0.00001   | 34 | 1 | 0 | -7.523678 | -2.861822 | 1.160688  |
| 10  | 6    | 0    | -0.631237               | -1.123693 | 0.447365  | 35 | 1 | 0 | -4.9541   | -4.005205 | -2.091561 |
| 11  | 6    | 0    | -0.631239               | 1.123706  | -0.447347 | 36 | 1 | 0 | -6.890886 | -4.493012 | -0.607951 |
| 12  | 6    | 0    | -2.016062               | -1.12331  | 0.451993  | 37 | 6 | 0 | -4.861416 | 1.211902  | 0.158299  |
| 13  | 1    | 0    | -0.091216               | -1.994922 | 0.805339  | 38 | 6 | 0 | -4.510768 | 2.123498  | 1.159824  |
| 14  | 6    | 0    | -2.016064               | 1.123317  | -0.451983 | 39 | 6 | 0 | -5.949391 | 1.485137  | -0.676906 |
| 15  | 1    | 0    | -0.09122                | 1.994936  | -0.805319 | 40 | 6 | 0 | -5.234932 | 3.303402  | 1.311771  |
| 16  | 6    | 0    | -2.733661               | 0.000002  | 0.000003  | 41 | 1 | 0 | -3.672131 | 1.903054  | 1.814637  |
| 17  | 1    | 0    | -2.552652               | -1.994438 | 0.813345  | 42 | 6 | 0 | -6.679624 | 2.659396  | -0.507978 |
| 18  | 1    | 0    | -2.552656               | 1.994442  | -0.813337 | 43 | 1 | 0 | -6.220016 | 0.772879  | -1.451508 |
| 19  | 9    | 0    | 6.904829                | 2.204355  | -0.836219 | 44 | 6 | 0 | -6.323772 | 3.575925  | 0.482118  |
| 20  | 9    | 0    | 4.223845                | 2.207844  | -0.838381 | 45 | 1 | 0 | -4.954125 | 4.005201  | 2.091557  |
| 21  | 9    | 0    | 4.22384                 | -2.207835 | 0.838392  | 46 | 1 | 0 | -7.523683 | 2.861809  | -1.160705 |
| 22  | 9    | 0    | 6.904824                | -2.20436  | 0.836211  | 47 | 1 | 0 | -6.890906 | 4.493001  | 0.607937  |
| 23  | 6    | 0    | 8.398395                | -0.000006 | -0.000009 |    |   |   |           |           |           |

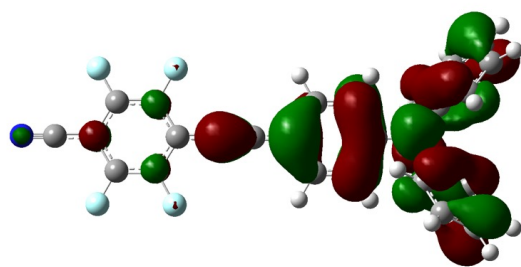

**HOMO**

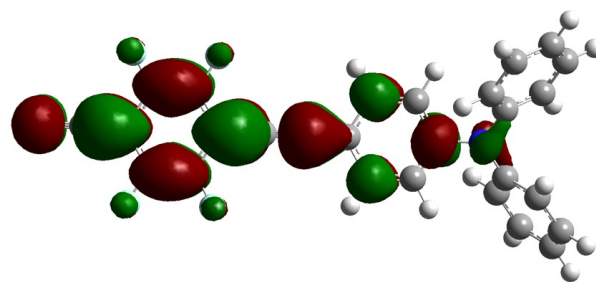

**LUMO**

**Table S5.** Cartesian coordinate for **1-H** at the optimized geometry in  $S_0$  state

| No. | Atom | Type | Coordinates (Angstroms) |           |           | 24 | 6 | 0 | -3.559415 | -2.241479 | 0.92328   |
|-----|------|------|-------------------------|-----------|-----------|----|---|---|-----------|-----------|-----------|
|     |      |      | X                       | Y         | Z         |    |   |   |           |           |           |
| 1   | 6    | 0    | -1.106229               | 1.034439  | 0.626233  | 26 | 6 | 0 | -4.270405 | -3.438195 | 0.962235  |
| 2   | 6    | 0    | 0.280243                | 1.036102  | 0.62078   | 27 | 1 | 0 | -2.700913 | -2.090041 | 1.571767  |
| 3   | 6    | 0    | 0.997975                | 0         | 0         | 28 | 6 | 0 | -5.776992 | -2.606117 | -0.724831 |
| 4   | 6    | 0    | 0.280242                | -1.036103 | -0.62078  | 29 | 1 | 0 | -5.360482 | -0.621735 | -1.46343  |
| 5   | 6    | 0    | -1.106229               | -1.034439 | -0.626233 | 30 | 6 | 0 | -5.384103 | -3.626292 | 0.142323  |
| 6   | 6    | 0    | -1.821801               | 0         | 0         | 31 | 1 | 0 | -3.959187 | -4.22124  | 1.647471  |
| 7   | 1    | 0    | -1.644842               | 1.836313  | 1.121452  | 32 | 1 | 0 | -6.639804 | -2.741316 | -1.370469 |
| 8   | 1    | 0    | 0.819851                | 1.839393  | 1.113276  | 33 | 1 | 0 | -5.940793 | -4.557489 | 0.180191  |
| 9   | 1    | 0    | 0.81985                 | -1.839394 | -1.113276 | 34 | 6 | 0 | 2.427384  | -0.000001 | -0.000001 |
| 10  | 1    | 0    | -1.644842               | -1.836313 | -1.121452 | 35 | 6 | 0 | 3.641781  | -0.000001 | -0.000001 |
| 11  | 7    | 0    | -3.226606               | 0         | 0         | 36 | 6 | 0 | 5.071684  | 0         | 0         |
| 12  | 6    | 0    | -3.947316               | 1.223474  | -0.044527 | 37 | 6 | 0 | 5.779737  | -1.022641 | -0.655281 |
| 13  | 6    | 0    | -3.559414               | 2.241479  | -0.92328  | 38 | 6 | 0 | 5.779737  | 1.022641  | 0.65528   |
| 14  | 6    | 0    | -5.060435               | 1.412954  | 0.78199   | 39 | 6 | 0 | 7.166875  | -1.024666 | -0.65653  |
| 15  | 6    | 0    | -4.270404               | 3.438195  | -0.962235 | 40 | 1 | 0 | 5.233556  | -1.811775 | -1.161265 |
| 16  | 1    | 0    | -2.700913               | 2.090041  | -1.571767 | 41 | 6 | 0 | 7.166875  | 1.024666  | 0.65653   |
| 17  | 6    | 0    | -5.776991               | 2.606117  | 0.724831  | 42 | 1 | 0 | 5.233555  | 1.811775  | 1.161264  |
| 18  | 1    | 0    | -5.360482               | 0.621735  | 1.46343   | 43 | 6 | 0 | 7.861345  | 0         | 0         |
| 19  | 6    | 0    | -5.384103               | 3.626292  | -0.142323 | 44 | 1 | 0 | 7.714367  | -1.813268 | -1.162039 |
| 20  | 1    | 0    | -3.959186               | 4.22124   | -1.647471 | 45 | 1 | 0 | 7.714366  | 1.813269  | 1.162039  |
| 21  | 1    | 0    | -6.639804               | 2.741317  | 1.370469  | 46 | 6 | 0 | 9.299986  | 0         | 0.000001  |
| 22  | 1    | 0    | -5.940792               | 4.55749   | -0.180191 | 47 | 7 | 0 | 10.458442 | 0.000001  | 0.000001  |
| 23  | 6    | 0    | -3.947316               | -1.223474 | 0.044527  |    |   |   |           |           |           |



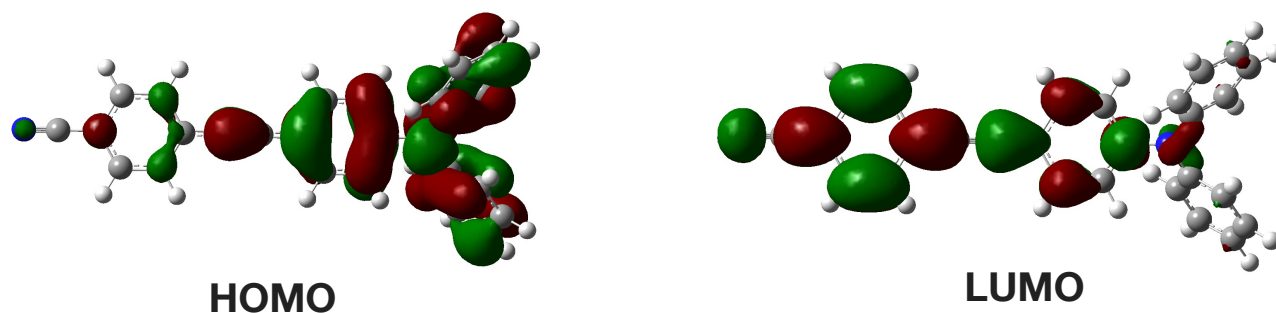

## 5. Photophysical Characteristics

UV-vis absorption spectra were recorded on a JASCO V-500 absorption spectrometer. Steady-state PL spectra in solution and in crystal, and quantum yields were acquired using a JASCO FP-6600 fluorescence spectrometer or an absolute PL quantum yield measurement system (Quantaury-QY, Hamamatsu Photonics, C11347-01) with a calibrated integrating sphere.

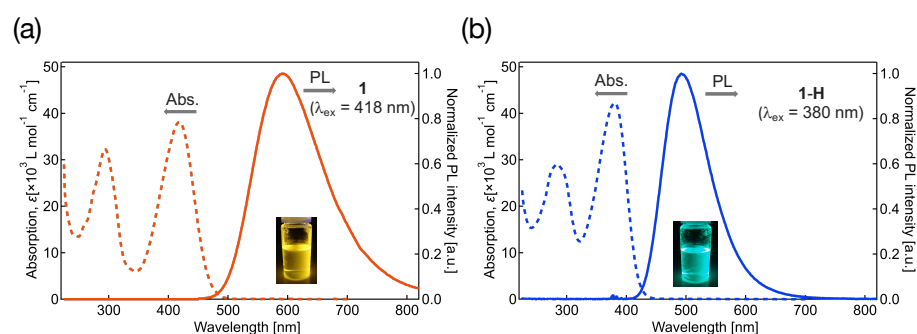

**Figure S4.** UV-vis and PL spectra of **1**, **1-H** in  $\text{CH}_2\text{Cl}_2$  solution. Concentration:  $1.0 \times 10^{-5}$  mol  $\text{L}^{-1}$  for UV-vis and PL.

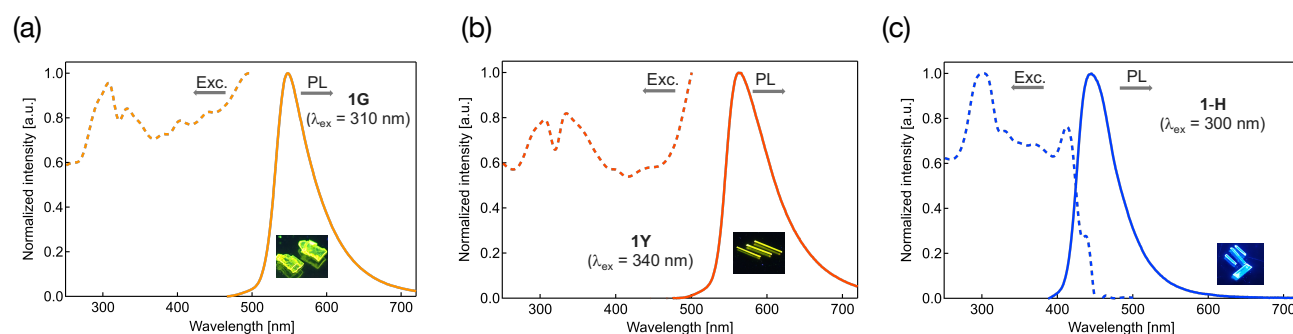

**Figure S5.** Excitation and PL spectra of **1G**, **1Y**, **1-H** in crystalline state. Excitation spectra were obtained by monitoring PL at the maximum PL wavelength ( $\lambda_{\text{em}} = 547$  nm for **1G**, 563 nm for **1Y**, 445 nm for **1-H**).

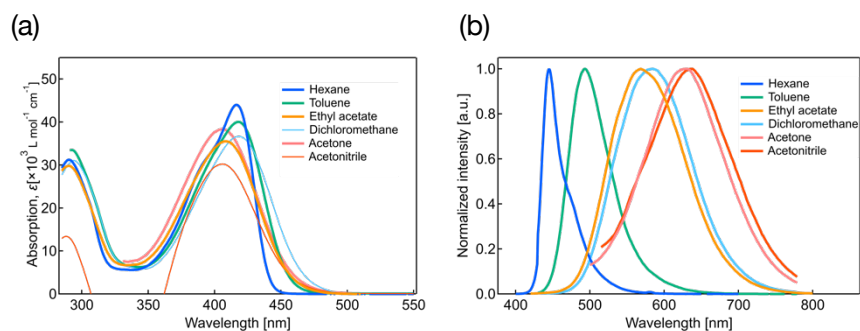

**Figure S6** (a) UV-vis and (b) PL spectra of **1** in different solvents (Excited with a light at the  $\lambda_{\text{abs}}$ ).

**Table S6.** Photophysical properties of **1** in different solvents.

|                 | $\lambda_{\text{abs}}/\text{nm}$ | $\lambda_{\text{em}}/\text{nm}$ | $\Phi_{\text{em}}$ |
|-----------------|----------------------------------|---------------------------------|--------------------|
| Hexane          | 417                              | 445                             | 1.00               |
| Toluene         | 418                              | 493                             | 0.90               |
| Ethyl acetate   | 409                              | 568                             | 0.41               |
| Dichloromethane | 412                              | 585                             | 0.45               |
| Acetone         | 406                              | 632                             | 0.02               |
| Acetonitrile    | 406                              | 635                             | <0.01              |

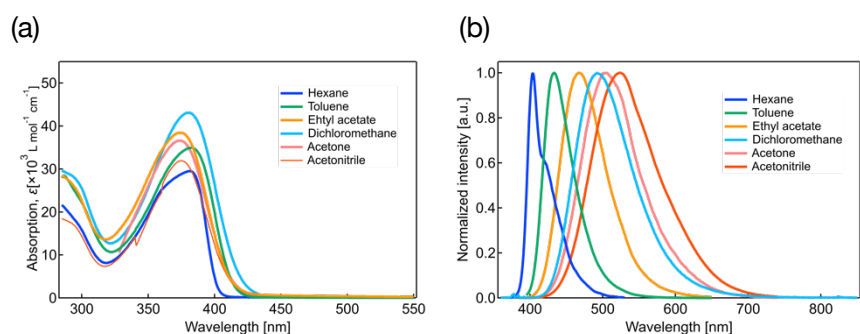

**Figure S7** (a) UV-vis and (b) PL spectra of **1-H** in different solvents (Excited with a light at the  $\lambda_{\text{abs}}$ ).

**Table S7.** Photophysical properties of **1-H** in different solvents.

|                 | $\lambda_{\text{abs}}/\text{nm}$ | $\lambda_{\text{em}}/\text{nm}$ | $\Phi_{\text{em}}$ |
|-----------------|----------------------------------|---------------------------------|--------------------|
| Hexane          | 381                              | 404, 420sh                      | 0.56               |
| Toluene         | 382                              | 433                             | 0.88               |
| Ethyl acetate   | 374                              | 467                             | 0.87               |
| Dichloromethane | 380                              | 491                             | 0.97               |
| Acetone         | 374                              | 501                             | 0.81               |
| Acetonitrile    | 375                              | 524                             | 0.79               |

## 6. References

1. M. J. Piao, K. Chajara, S. J. Yoon, H. M. Kim, S. J. Jeon, T. H. Kim, K. Song, I. Asselberghs, A. Persoons, K. Clays and B. R. Cho, *Journal of Materials Chemistry*, 2006, **16**, 2273–2281.
2. O. V. Dolomanov, L. J. Bourhis, R. J. Gildea, J. A. K. Howard and H. Puschmann, *J. Appl. Crystallogr.*, 2009, **42**, 339–341.
3. G. M. Sheldrick, *Acta Crystallogr. Sect. C Struct. Chem.*, 2015, **71**, 3–8.
4. a) J. Andzelm, C. Kölmel and A. Klamt, *J. Chem. Phys.*, 1995, **103**, 9312; (b) V. Barone and M. Cossi, *J. Phys. Chem. A*, 1998, **102**, 1995; (c) M. Cossi, N. Rega, G. Scalmani and V. Barone, *J. Comput. Chem.*, 2003, **24**, 669.
